# Supplementary material
Source: PubMed Central journal article supplement (PMC10754359)
Supplement: NIHMS1951286-supplement-Supplementary_file_S.pdf [file NIHMS1951286-supplement-Supplementary_file_S.pdf]

**Table S1. Cellularity Statistics**

| Sample comparison   | Radiation (Gy) | Mean Difference | 95.00% CI of Difference | Adjusted P Value |
|---------------------|----------------|-----------------|-------------------------|------------------|
| Sham vs. 13-15 days | 5.8-8.5        | 64.3            | 46.02 to 82.65          | 0.0002           |
| Sham vs. 21-30 days | 4-5.8          | -20.3           | -40.44 to -0.22         | 0.0471           |
| Sham vs. 60 days    | 4-6.5          | 16.3            | -40.24 to 72.91         | 0.9340           |
| Sham vs. 60 days    | 6.5-7.6        | 23.0            | -6.88 to 52.89          | 0.1662           |
| Sham vs. 4-7 days   | 12             | 61.8            | 41.96 to 81.54          | 0.0007           |

Note. Dunnett's T3 multiple comparison test.

**Table S2. Hemosiderin Colorometric Analysis Statistics**

| Sample comparison   | Radiation (Gy) | Mean Difference | 95.00% CI of Difference | Adjusted P Value |
|---------------------|----------------|-----------------|-------------------------|------------------|
| Sham vs. 13-15 days | 5.8-8.5        | -3.262          | -15.49 to 8.96          | 0.4885           |
| Sham vs. 21-30 days | 4-5.8          | -0.08677        | -0.311 to 0.14          | 0.6850           |
| Sham vs. 60 days    | 4-6.5          | -0.4843         | -1.48 to 0.51           | 0.4639           |
| Sham vs. 60 days    | 6.5-7.6        | -0.6508         | -1.81 to 0.57           | 0.3807           |
| Sham vs. 4-7 days   | 12             | -3.952          | -13.20 to 5.29          | 0.5929           |

Note. Dunnett's T3 multiple comparison test.

**Table S3. Prussian Blue Staining Colorometric Analysis Statistics**

| Sample comparison   | Radiation (Gy) | Mean Difference | 95.00% CI of Difference | Adjusted P Value |
|---------------------|----------------|-----------------|-------------------------|------------------|
| Sham vs. 13-15 days | 5.8-8.5        | -2.003          | -3.14 to -0.87          | 0.0099           |
| Sham vs. 21-30 days | 4-5.8          | -0.8434         | -2.66 to 0.97           | 0.5095           |
| Sham vs. 60 days    | 4-6.5          | -0.1299         | -0.70 to 0.44           | 0.9921           |
| Sham vs. 60 days    | 6.5-7.6        | -0.3067         | -1.01 to 0.40           | 0.6946           |
| Sham vs. 4-7 days   | 12             | -2.555          | -6.22 to 1.11           | 0.2039           |

Note. Dunnett's T3 multiple comparison test.
